1 A longitudinal study of perceived stress and cortisol responses in an undergraduate  
2 student population from India

3

4 Anuradha Batabyal<sup>1\*</sup>, Anindita Bhattacharya<sup>1\*</sup>, Maria Thaker<sup>2</sup>, Shomen Mukherjee<sup>1</sup>

5 <sup>1</sup>*Azim Premji University, Bengaluru, India*

6 <sup>2</sup>*Indian Institute of Science, Bengaluru, India*

7

8

9

10

11

12

13

14

15

16

17

18

19

20

21

\*Authors for correspondence:

22

anuradha\_batabyal@yahoo.com; anindita.bhattacharya@apu.edu.in

23

24

25

26

27

28

29

30

31

32

33

34

35

36

37

38

39

40

41 **Abstract**

42

43 Young adults entering into college experience immense shifts in both personal and  
44 professional environments and this may result in some of them experiencing a lot of  
45 stress and difficulty in coping with their new surroundings. Such potentially stressful  
46 events may trigger multiple psychological as well as physiological effects. The  
47 current study investigated multiple psychological parameters such as PSS14  
48 (Perceived Stress Scale), K10 (distress scale) and positive mood measures, along  
49 with salivary cortisol levels, in a repeated measures longitudinal study of first year  
50 students (~ 19 years of age) enrolled at a residential college in India. Six salivary  
51 cortisol samples were collected over a one-year period from 20 students. On each  
52 sampling day, a questionnaire designed to evaluate (K10, PSS14 and Mood)  
53 psychological parameters was also administered.

54 Overall, men showed a significantly lower level of salivary cortisol compared to  
55 women. Men also showed a decrease in perceived stress (PSS14) and distress  
56 (K10) with time. However, women reported similar perceived stress and distress  
57 levels all year round. Academic stress was reported by the students to be the most  
58 important stressor, whereas financial stress was reported the least number of times  
59 by all participants. Our results suggest that men seem to have a better capability to  
60 adjust to the new environment of a residential program with time. In contrast, women  
61 show an elevation in salivary cortisol at the end of the semester (the final  
62 assessment stage) in spite of a continuous assessment curricular design. This study  
63 not only provides an important glimpse into the sex differences in stress response in  
64 the first one year of joining an undergraduate program, but it also provides a  
65 valuable longitudinal dataset from the Indian undergraduate student cohort which is  
66 lacking in literature.

67

68

69

70

71

72

73

74

75

76

77

78 **Keywords:** psychological, student stress, academic stress, residential program,  
79 gender differences, physiological

80

81

82

83

84

85

86

87

88

89

90

## 91 **Introduction**

92 Stress is any event that poses a threat or challenge to physical and mental wellbeing  
93 of an individual (Lazarus and Folkman, 1984). Emerging adults starting college, face  
94 stressful events such as coping with a new academic environment, relational  
95 responsibility, future financial security and, searching for their own identity among  
96 others (Kadison and DeGeronimo, 2004). Late adolescence is a critical age where  
97 stressors can affect the physiology and psychology of individuals and risk  
98 development of mental health issues in the future (Tennant, 2002). Early life  
99 stressors can lead to the onset of anxiety symptoms (Breslau et al., 1997),  
100 depression (Brown et al., 1996), schizophrenia (Patel et al., 2007) and even suicidal  
101 tendencies (Wilcox et al., 2010). The major physiological reaction mechanism by  
102 which individuals cope with any stressor is the activation of Hypothalamo-Pituitary-  
103 Adrenal (HPA) axis. Secretion of glucocorticoid hormones especially cortisol from an  
104 activated HPA axis mediates a suite of physiological responses that has immediate  
105 adaptive function to reduce the impact of the stressor. But prolonged and repeated  
106 encounter with stressors leads to dysregulation of the HPA axis, causing detrimental  
107 effects on multiple organs and systems (Bollini et al., 2004; López et al., 1999;  
108 Sapolsky, 1996; Tsigos and Chrousos, 2002). Chronic stress can result in hyper  
109 secretion of cortisol thus downregulating receptor numbers which results in lower  
110 negative feedback to the hypothalamus and in one extreme can lead to exaggerated  
111 responses to stressful events (e.g. Cushing's syndrome; Sapolsky et al., 2000).  
112 Habituation of HPA axis to repeated stressors are also common and this leads to  
113 lowering of cortisol levels or blunted diurnal cortisol profile (Thoma et al., 2017).  
114 Additionally, higher stress and cortisol level has been found to negatively affect  
115 hippocampus which is the major memory control centre (Brown et al., 1996).  
116 Therefore, not only does the HPA axis functions in maintaining the basal and stress-  
117 related homeostasis but also regulates emotional and cognitive centres in the brain.  
118 Thus, for students, chronic stress is likely to interfere with their present academic  
119 performance as well as affect long term physical and mental health. However,  
120 functioning of basal and reactive responses of the HPA axis is affected by a  
121 multitude of other factors from age, sex, dietary intakes, early life experiences, and  
122 social factors as well as steroid hormone levels and subjective psychological stress  
123 responses (Hsiao et al., 2011). Thus, how students respond to stressors will be  
124 highly variable, depending on all the other associated factors that influence their  
125 lives.

126 Psychological stressors are among the most important factor affecting HPA axis  
127 activity but extensive research connecting HPA axis reactivity and perceived stress  
128 responses have found variable relationships (Halford et al., 2012). In some cases,  
129 perceived control over stressful events and perception of stress of an immediate  
130 stress stimulus have been shown to affect psychological and physiological  
131 responses (e.g. Halford et al., 2012). In other cases, negative or no correlation  
132 between physiological responses especially cortisol levels and psychological or  
133 subjective stress measures are found (e.g., Halford et al., 2012). Some of this  
134 variation can also be attributed to the psychological traits being measured as all  
135 parameters are not directly influenced by physiological responses or vice versa. The  
136 major psychological measures used across studies are perceived stress scale  
137 (PSS), active coping measures, mood scores as well as anxiety-depression scores  
138 (Halford et al., 2012). Among these, PSS has been used extensively and it measures  
139 the degree to which situations in one's life were appraised as stressful during the last  
140 month. Similarly, positive and negative mood scores also help to quantify the overall

141 mood of an individual over the last month (Watson et al., 1988). Though such  
142 psychological measures are an effective way to understand the major causes of  
143 acute or chronic stress, the inconsistency in relationship between physiological and  
144 psychological responses is not surprising, given the fact that there is a complex  
145 neurobiological interplay between perceived stress and HPA axis functioning. Thus,  
146 to better understand and assess stressful life events for an individual, both  
147 measurements of physiology and psychology will provide a more comprehensive  
148 model approach. On one hand perceived stress measures from psychological  
149 surveys help quantify the causes of stress and provides an overall idea of chronic  
150 stressors over a month-long period whereas immediate responses to acute stressors  
151 are captured by cortisol measures which also helps to assess potential health risks  
152 in the long-term.

153 Salivary cortisol has been repeatedly used across studies as a biochemical marker  
154 for stress as it can be easily and non-invasively collected. Early morning cortisol  
155 levels have been observed to be lower than typical following post-traumatic stress  
156 disorder (Wessa et al., 2006), exhaustion (Mommersteeg et al., 2007) and  
157 depression (Stetler and Miller, 2005), and elevated responses has been observed in  
158 individuals experiencing high work stress (Schulz and Schlotz, 1999). Most studies  
159 have been investigating stress and cortisol responses under laboratory conditions by  
160 inducing stressful stimuli such as the Trier Social Test or other social challenges  
161 (Ellenbogen et al., 2010; Entringer et al., 2010; Espín et al., 2016; Hakamata et al.,  
162 2013; Schlotz et al., 2011). Very few studies till date have evaluated stress under  
163 real-life conditions and across a longitudinal or repeated scale (Bardi et al., 2011;  
164 González-Cabrera et al., 2014).

165 The present study was conducted on a group of residential undergraduate students  
166 of biology majors for an entire year. We selected students during their first year of  
167 joining the academic program to understand how students cope with a change in  
168 both their academic and personal environment. We measured psychological stress  
169 parameters and salivary cortisol in students with repeated sampling of 6 times during  
170 the early morning hours before breakfast to understand the relationship between  
171 physiological and psychological measures of stress across the repeated sampling  
172 events. We hypothesised that stress perception within-individuals would be  
173 associated with elevation in cortisol responses. We also anticipated differences in  
174 cortisol and perceived stress responses between men and women (similar to other  
175 findings by Austin et al., 2018; Dawson et al., 2014). We finally predicted a decrease  
176 in perceived as well as physiological stress response along the longitudinal scale as  
177 individuals were expected to adjust to the novel academic and social environment  
178 over time. To our knowledge this is the first longitudinal study to test both perceived  
179 and physiological stress response in undergraduate college students from India.

180

## 181 **Material and methods**

182

### 183 *Participants*

184 Twenty-five undergraduate residential students from the biology major participated in  
185 this longitudinal study. Participation for this study was voluntary and we had  
186 repeated measurements for ~20 individuals across each time point (Men=7,  
187 Women=15; age= 17-21years; Time points=6). The study was conducted from  
188 August 2018 to May 2019 with sampling done in the months of August (1),  
189 September (2), November (3), January (4), March (5) and May (6). We collected 3  
190 samples in the first semester (August-November) and 3 samples in the second

191 semester (January-May). The two sampling points of 5 and 6 at the end of the  
192 second semester (March and May) were during assignment submission and during  
193 the end-of-the-year examinations.

194

#### 195 *Procedure*

196 We measured cortisol through salivary measurements and perceived stress through  
197 questionnaires. Participants provided saliva samples before breakfast between  
198 08:00-08:30h and we ensured that individuals did not eat, drink or brushed their  
199 teeth 30 mins prior to providing the samples. Participants were requested to  
200 passively accumulate and provide ~1-2ml saliva in conical 10ml centrifuge tubes. All  
201 samples were stored at -20°C for further analysis. On the same day of saliva  
202 collection participants also filled out questionnaires corresponding to perceived  
203 stress. The same protocol was used for all repeated measurements. We did not  
204 control for menstrual cycle phase for the women participants as early morning  
205 cortisol responses are not expected to be significantly affected by menstrual phase  
206 (Kudielka and Kirschbaum, 2003).

207

#### 208 *Salivary cortisol*

209 Before cortisol analysis, all samples were thawed and centrifuged at 3500rpm for 20  
210 min and the supernatant was used for further analyses. Enzyme-Immuno Assay kits  
211 (Arbor Assay DetectX Cortisol K003-H5) were used to measure circulating cortisol  
212 level. EIA kits were first optimized (Wada et al., 2007) and we subsequently  
213 analysed samples at a dilution ratio of 1:4 in duplicate across 4 assays. Percent  
214 recovery of cortisol in the assay was 98.93, with an intra-assay coefficient of  
215 variation of 0.12-6.84 and an inter-assay coefficient of variation at 9.51 (Inter-assay  
216 CV were calculated from a lab standard of known concentration placed on all plates).  
217 Hormone levels were determined in reference to seven-point standard curve with a  
218 limit of detection at 0.016 ng/ml for cortisol.

219

#### 220 *Psychological evaluation*

221 All participants completed questionnaire on the same day as saliva collection. Three  
222 self-reported subjective measures of psychological state were quantified from the  
223 questionnaire data: K10 distress scale (Kessler et al., 2002), Perceived Stress  
224 Scale-14 (Cohen et al., 1983) and positive mood measure (Watson et al., 1988). K10  
225 was calculated on a 5-point scale with distress or K10 measures having 10 questions  
226 on how often individuals felt tired/nervous/distressed with scoring from “all of the  
227 time” to “none of the time”. Positive mood score was calculated similarly on a 5- point  
228 scale from a total of 13 questions, with individuals scoring how  
229 inspired/peaceful/satisfied they felt over the last month on a scale from “extremely” to  
230 “none at all”. Perceived stress scale (PSS) comprised of a 14-item questionnaire with  
231 scores from 0-4 describing how often individuals felt a certain way in the last month.  
232 PSS14 included both positive and negative items and for analysis, the positive  
233 scores were reversed before calculating the final PSS score (Cohen et al., 1983).  
234 Along with the above three measures we also asked participants one open ended  
235 question - what aspect of their life caused maximum stress in the last month:  
236 academic, own health, health of close one, relationship stress, family issues,  
237 financial issues or any other. General data on health issues and medical history were  
238 also obtained. We excluded one individual who was on medication as this would  
239 severely affect their cortisol response. Sample of the study questionnaire is provided  
240 in the supplementary material.

241

### 242 *Ethical consideration*

243 Participation in this study was voluntary, and the informed consent form was signed  
244 by participants at all time points during the sampling. The study was performed in  
245 accordance with the Declaration of Helsinki and was approved by the ethics  
246 committee of Azim Premji University.

247

### 248 *Statistical Analyses*

249 Individuals were sampled at 6 time points and cortisol, PSS14, K10 and Mood  
250 scores were quantified at each. To test whether cortisol, PSS14, K10 and Mood  
251 were independently different between sexes across the six different time points, we  
252 performed separate linear mixed effect model analyses (R package: lmer and lmer  
253 Test, Kuznetsova et al. 2017) for all response variables except the K10 Distress  
254 scale where we used generalised linear mixed effect modelling as data was non-  
255 normal (R package: glmmADMB, Bolker et al. 2012). We also log transformed  
256 cortisol data to normalise it before performing the linear mixed effect models. In all  
257 models, sex and time points were used as interacting fixed factors and individual  
258 identity as random effect. All individuals did not participate across all time points and  
259 thus we avoided using a parametric repeated ANOVA for the analyses and instead  
260 used a mixed model framework which would account for differences in sample  
261 repeats.

262 Further to understand if physiological (Cortisol) and psychological (K10, Mood,  
263 PSS14) parameters were correlated, we first tested if all psychological parameters  
264 were independent or correlated using Pearson's correlation. We found that all  
265 variables were significantly correlated with each other (PSS14 and K10:  $t=6.12$ ,  
266  $p<0.001$ , Pearson's correlation coefficient=0.48; PSS14 and Mood:  $t=-6.15$ ,  $p<0.001$ ,  
267 Pearson's correlation coefficient=-0.48) and thus we only used PSS14 to test for  
268 correlation between psychological and physiological responses (cortisol). We used  
269 Pearson's correlation analyses for each time point and sex. We finally scored  
270 presence and absence of various types of stressors (based on the open-ended  
271 question): academic, own health, health of close one, relationship stress, family  
272 issues and financial issues and used a generalised linear mixed effect modelling with  
273 a binomial distribution to test which stressor type contributed most across each time  
274 point for both sexes. For this, data was divided across sexes and we ran two  
275 separate GLMMs, with presence or absence (1/0) as our response, time point and  
276 stressor type as our fixed factors and individual identity as random effect. All post-  
277 hoc comparisons were performed using lsmeans function (package: lsmeans; Length  
278 2016) and all statistical analyses was performed using R version 3.6 (R core team  
279 2019).

280

## 281 **Results**

282

### 283 *Psychological and physiological stress across time*

284 We found sex differences across time points for cortisol response and all other  
285 psychological variables except the mood parameter. There was a significant  
286 interaction effect of sex and time point for the K10 Distress scale wherein women  
287 were not different across all time points (all  $t<2.50$ ,  $p>0.05$ , Fig. 1a) but men showed  
288 decreased levels of distress from time points 1 to 4 ( $t=3.86$ ,  $p=0.002$ , Fig. 1a), 1 to 6  
289 ( $t=2.94$ ,  $p=0.044$ , Fig 1a) and also 2 to 6 ( $t=2.98$ ,  $p=0.039$ , Fig 1a). Similarly, for  
290 PSS14 we found no difference across time points for women (all  $t<1.85$ ,  $p>0.05$ , Fig.

291 1b) but men showed a decrease in PSS14 from time points 1 to 5 ( $t=2.96$ ,  $p=0.046$ ,  
292 Fig. 1b) and 2 to 5 ( $t=2.98$ ,  $p=0.041$ , Fig. 1b). There was no significant difference  
293 between the sexes or across time points for Mood scores (Fig. 1c). Thus, we found  
294 that men, but not women showed a reduction in perceived level of stress (PSS14)  
295 and distress (K10) across time.

296 Similar to the psychological stress responses, there was a significant difference  
297 between men and women in cortisol response with men having overall lower levels  
298 of circulating cortisol compared to women ( $t=-2.05$ ,  $p=0.042$ , Fig. 1d). We also found  
299 cortisol levels to be significantly higher for women at time point 5 compared to the  
300 first time point ( $t=2.22$ ,  $p=0.028$ , Fig. 1d).

301 Contribution of individual identity or random effect across all models was 1.5  
302 standard deviation or lower.

303

#### 304 *Correlation between physiological and psychological stress responses*

305 When tested separately across sexes and across all time points, we found no  
306 significant correlation between PSS14 and cortisol for any combination of sex and  
307 time (all  $p>0.05$ ).

308

#### 309 *Types of stressors*

310 All students reported binary (yes/no) responses for presence or absence of different  
311 types of stressors which were academic, own health, health of close ones,  
312 relationship, financial and family. There were no sex differences across types of  
313 stressors reported ( $z=-0.66$ ,  $p=0.509$ ), but different type of stressors significantly  
314 differed across time. We thus divided the data across sexes and performed separate  
315 mixed effect models to understand how the stressors were different across time  
316 points. Total number of stressors reported by both men and women were lowest at  
317 time point 4 compared to time point 1 (men:  $z=-2.5$ ,  $p=0.012$ , Fig. 2a; women:  $z=-$   
318  $2.86$ ,  $p=0.004$ , Fig. 2b). Additionally, men also reported a significantly lower number  
319 of stressors at time point 5 compared to 1 ( $z=-2.23$ ,  $p=0.025$ , Fig. 2a).

320 Academic stressor was reported by both males and females the greatest number of  
321 times compared to all other stressor types (all  $z>3$ ,  $p<0.03$ , Fig.2). After academic  
322 stressor, own health was reported to be next highest compared to financial stress  
323 which was reported least number of times (men:  $z=3.02$ ,  $p=0.026$ , Fig. 2a; women:  
324  $z=3.04$ ,  $p=0.024$ , Fig. 2b). Men also reported relationship stress more often than  
325 financial stress ( $z=2.90$ ,  $p=0.037$ , Fig. 2a).

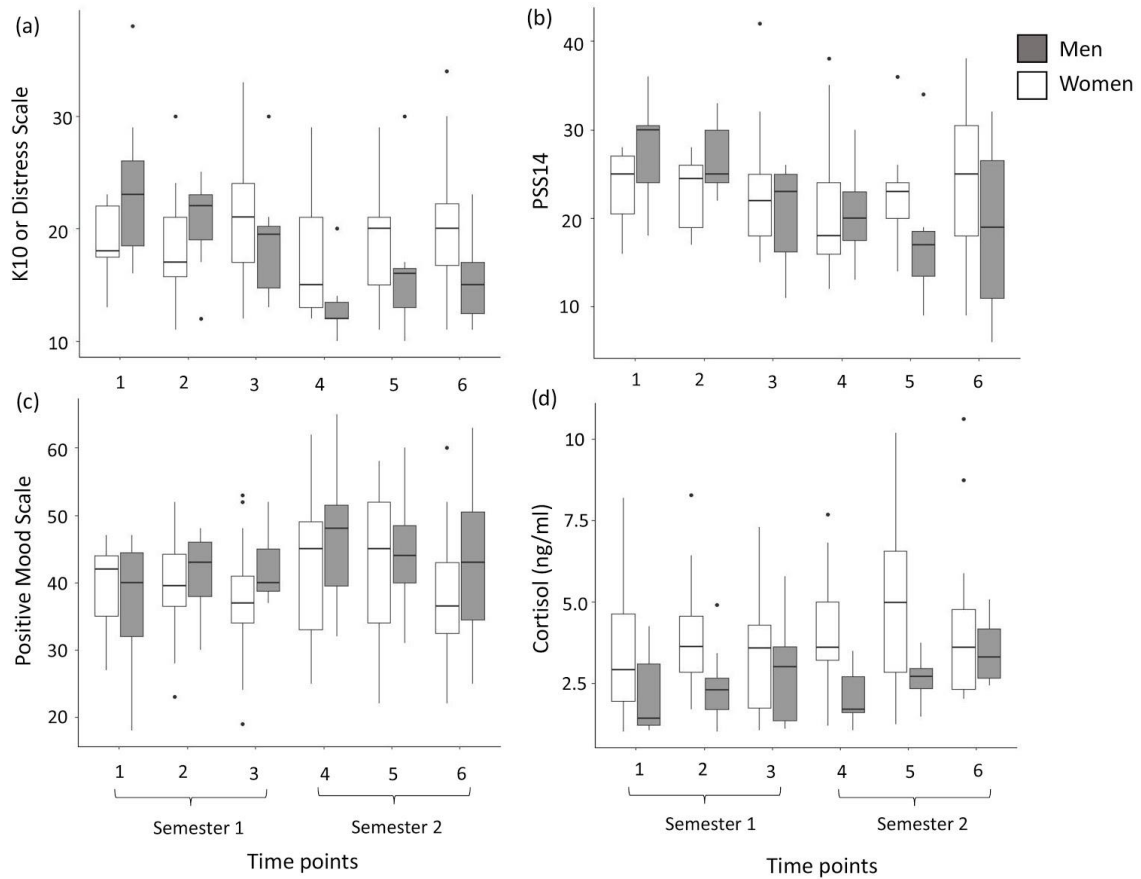

326  
327  
328  
329  
330  
331  
332

Figure 1. Psychological measures of (a) K10 Distress scale, (b) PSS14, (c) Mood scale and physiological measures of (d) Cortisol levels of men and women across all time points. Grey and white boxes represent responses of men and women respectively. Boxplots show medians, quartiles, 5<sup>th</sup> and 95<sup>th</sup> percentiles and extreme values.



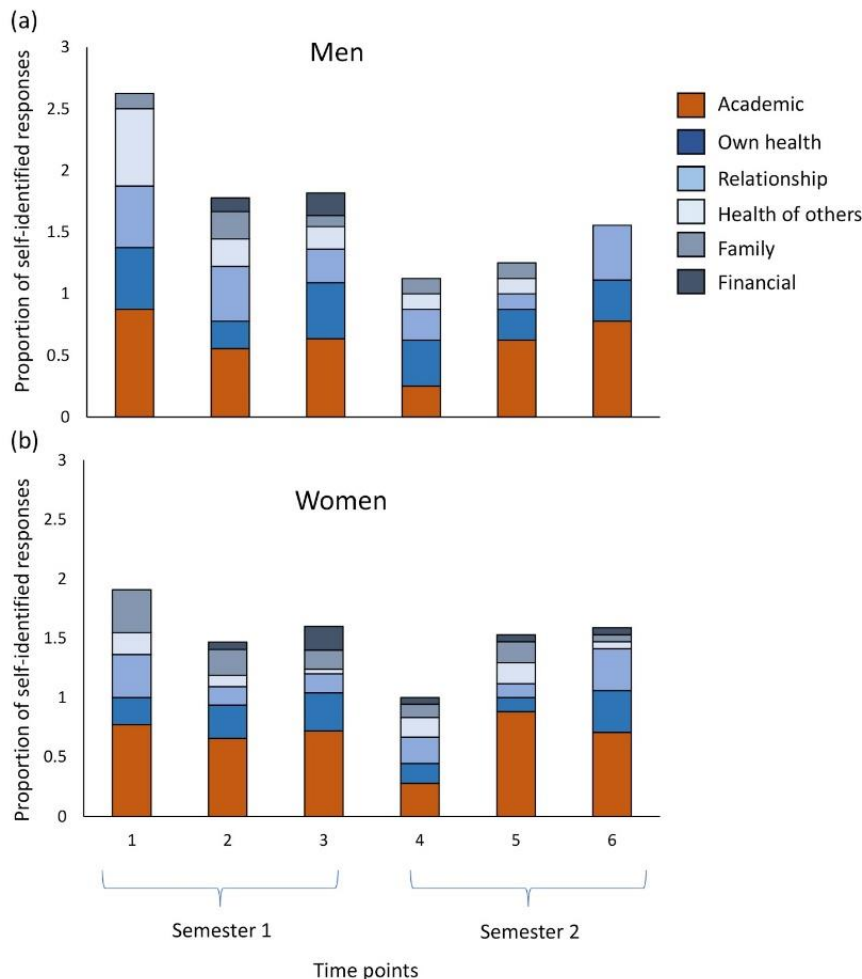

333

334 Figure 2. Stacked bar plot shows proportion of self-identified responses for the  
335 different types of stressors reported across all time points by (a) men and (b) women  
336 participants.

337

### 338 Discussion

339 The current study provides a combination of measures from both psychological or  
340 perceived stress as well as physiological or cortisol responses of residential  
341 undergraduate students across a yearlong period. Both men and women students  
342 participated in the study and we found that overall, men had lower salivary cortisol  
343 levels across the year compared to women. Men also reported a lower score of  
344 perceived stress and distress as time progressed after joining the first year of  
345 undergraduate education. Women participants reported similar levels of perceived  
346 stress and distress across the year although their cortisol responses increased  
347 during the end of the semester when assignment submissions were due. When  
348 asked about the different types of stressors, students reported academic stress to be  
349 the most prevalent as this was reported the maximum number of times across all  
350 time points. Financial stress was reported the least number of times. Notably, we  
351 found no direct correlation between psychological stress perception and  
352 physiological stress responses (cortisol).

353 In humans, the end product of the stress-responsive neuroendocrine system or HPA  
354 axis is cortisol. Cortisol acts as the major regulatory hormone that mediates resource  
355 allocation during any stressful condition. Salivary cortisol is unbound by  
356 glycoproteins and therefore biologically active, and thus provides a good measure of

357 the stress reaction of an individual (Fink, 2000; Tsigos and Chrousos, 2002).  
358 Stressful stimuli can activate HPA axis functioning, which in turn elevates cortisol  
359 levels (McEwen, 1998). Interestingly, most of the human psychological stress studies  
360 have either found no significant difference between the sexes or have found that  
361 young men have elevated cortisol levels compared to young women when  
362 challenged with acute stressful tasks such as examinations or other laboratory stress  
363 tests (see review: Kudielka and Kirschbaum, 2005). This pattern is contrary to our  
364 results where we find that women have higher salivary cortisol levels compared to  
365 men across an entire year. However, unlike most previous studies, our study does  
366 not specifically induce any stressor to the participants and the salivary cortisol  
367 represents an unstimulated daily level. Two of the sampling points in our study were  
368 during assignment submission stages and we find an increase in salivary cortisol  
369 during one such time point (time 5, Fig 1d) compared to the initial time when there  
370 was no immediate academic pressure. This elevation in cortisol is likely to be  
371 attributed to the anticipation of stressful events (assignment deadlines and marks).  
372 The level of elevated salivary cortisol found during this time point in our study is  
373 similar to other studies where students are found to increase to comparable cortisol  
374 levels during examination (González-Cabrera et al., 2014; Singh et al., 2012).  
375 Stressful stimuli or stressful environments trigger both physiological and  
376 psychological responses and because both of these are indicators and outcomes of  
377 the same phenomenon, we expected some level of correlation between the two.  
378 However, we found no correlation between cortisol and other psychological  
379 variables, which is similar to the lack of association found in other studies (see  
380 reviews: Halford et al., 2008). This can be majorly attributed to the fact that salivary  
381 cortisol levels capture the current state whereas PSS14 or the K10 Distress scale  
382 used in our study captures perceived stress over a month-long period. Similar results  
383 are also observed in a large number of other studies which use PSS14 or PSS10 as  
384 a measure for psychological stress (Dawson et al., 2014; Manigault et al., 2018;  
385 Putterman and Linden, 2006), whereas the studies using immediate perceived  
386 stress measures such as Visual Analog Scale or Stress-O-meter tend to find a  
387 correlation between salivary cortisol and perceived stress measures (Chellew et al.,  
388 2015; Chong et al., 2017; Esch et al., 2007; Linnemann et al., 2015; Myint et al.,  
389 2011). Men in our study showed a decrease in both perceived stress score (PSS14)  
390 and distress score (K10) with progression of time. During semester 2, men reported  
391 significantly lower scores for perceived stress whereas women did not change their  
392 perception of stress from the start of the semester to the end of the academic year.  
393 This suggests that men might be adjusting to the new academic environment faster  
394 than women. Irrespective of the generally lower perception of stress by women and  
395 men, cortisol levels were highest during assignment submission and the end-of-the-  
396 year- examination time compared to the start of the semester. This further  
397 strengthens the view that cortisol level is majorly influenced by immediate stressors  
398 compared to perceived stress measures which are representation of a much longer  
399 time period.  
400 The major contributing factor for perceived stress in our study seems to be academic  
401 pressure as that was reported most often by both men and women across all time  
402 points. Overall stressors reported was lowest at the beginning of semester 2 when  
403 academic pressure was low and students returned to classes after a break. Though  
404 a similar pattern was expected at the beginning of semester 1, the anticipation of a  
405 new academic environment and the shift from high school to a college environment  
406 likely led to a heightened perception of academic stress at the beginning of semester

407 1. In some previous studies, financial stress has been reported to be a cause of  
408 major stressor for undergraduates coming from different socio-economic  
409 backgrounds (Kumar et al., 2009; Morra et al., 2008). However, in our study, we find  
410 financial stress to be reported least number of times and thus of least concern, which  
411 is most likely due to the financial security provided by the University through  
412 scholarships. Further, since students stay within a residential campus, they are  
413 partially protected from the daily exposure of individual and potentially, familial  
414 financial stress. It would be interesting to compare stress profiles of students  
415 studying under similar environment but from residential and non-residential study  
416 programs.

417 One major limitation of our study is that we did not have information on smoking  
418 behaviour or any other consumption of drugs or alcohol. While these variables can  
419 influence physiological responses, our repeated measures design should ameliorate  
420 the influence of such variables on our findings. We also did not include any  
421 questions on the menstrual cycle phase for women because previous studies report  
422 that morning cortisol responses were not altered by menstrual cycle phase (Kudielka  
423 and Kirschbaum, 2003). However, there have been other studies which also report  
424 that women in their luteal phase have similar cortisol responses as men, but women  
425 who are in their follicular phase or taking oral contraceptives tend to have lower  
426 cortisol responses compared to men (Clemens et al., 1999). In the current study,  
427 menstrual phase is unlikely to have influenced our findings and we find that women  
428 had higher cortisol responses than men across all time points despite the lack of  
429 including menstrual phase information as a covariate. We intentionally excluded  
430 information on diet, as our study was on residential campus, and thus all college  
431 students were provided the same food during the entire study duration. Finally, we  
432 had a sex-biased sample where there were more women than men in our study  
433 group and although we had a longitudinal study design, we obtained single  
434 measurements at each time point. Future studies should ideally have multiple  
435 measurements at each time point with a sex-balanced design along a longitudinal  
436 scale. Despite these potential weaknesses, the importance of measuring both  
437 physiological and psychological measures are clear, as we observe different patterns  
438 of cortisol and perceived stress across different time points in the academic  
439 semester. Future research using multiple variables for stress measurements with a  
440 greater sample size and longitudinal design would help in addressing the growing  
441 issue of poor mental health in academia. With such information on stress-induced  
442 triggers and when to expect them, we can also design optimal intervention strategies  
443 for a healthy young adult population.

444 The findings of the current study show that among first year undergraduate students  
445 from an Indian University, men experience lower perceived stress with time spent in  
446 a new academic environment and also exhibit significantly lower cortisol responses  
447 compared to women. Academic stressor was perceived as most significant and  
448 financial as least significant stressor in the first year of college.

449

#### 450 **Acknowledgements**

451 The authors would like to thank the 2018 BSc Biology students of Azim Premji  
452 University for volunteering for this study. We would also like to thank Anagha Menon  
453 and Elizabeth Matthew for help with collecting saliva samples. We would also like to  
454 thank Azim Premji University for funding this study.

455

456

457 **Competing interests**

458 The authors have no competing interests.

459

460

461 **References**

462 Austin, S.B., Rosario, M., McLaughlin, K.A., Roberts, A.L., Sarda, V., Yu, K.,

463 Missmer, S., Anatale-Tardiff, L., Scherer, E.A., 2018. Sexual orientation and  
464 salivary alpha-amylase diurnal rhythms in a cohort of U.S. young adults.

465 *Psychoneuroendocrinology* 97, 78–85.

466 <https://doi.org/10.1016/j.psyneuen.2018.07.006>

467 Bardi, M., Koone, T., Mewaldt, S., O'Connor, K., 2011. Behavioral and physiological  
468 correlates of stress related to examination performance in college chemistry

469 students. *Stress* 14, 557–566. <https://doi.org/10.3109/10253890.2011.571322>

470 Bolker B, Skaug H, Magnusson A, Nielsen A.,2012 Getting started with the

471 glmmADMB package. Available at [glmmadmb.r-forge.r-project.](http://glmmadmb.r-forge.r-project.org/glmmADMB)

472 [org/glmmADMB.](http://glmmadmb.r-forge.r-project.org/glmmADMB)

473 Bollini, A.M., Walker, E.F., Hamann, S., Kestler, L., 2004. The influence of perceived  
474 control and locus of control on the cortisol and subjective responses to stress.

475 *Biol. Psychol.* 67, 245–260. <https://doi.org/10.1016/j.biopsycho.2003.11.002>

476 Breslau, N., Davis, G.C., Peterson, E.L., Schultz, L., 1997. Psychiatric Sequelae of

477 Posttraumatic Stress Disorder in Women. *Arch. Gen. Psychiatry* 54, 81.

478 <https://doi.org/10.1001/archpsyc.1997.01830130087016>

479 Brown, G.W., Harris, T.O., Eales, M.J., 1996. Social Factors and Comorbidity of  
480 Depressive and Anxiety Disorders. *Br. J. Psychiatry* 168, 50–57.

481 <https://doi.org/10.1192/S0007125000298413>

482 Chellew, K., Evans, P., Fornes-Vives, J., Pérez, G., Garcia-Banda, G., 2015. The  
483 effect of progressive muscle relaxation on daily cortisol secretion. *Stress* 18,

484 538–544. <https://doi.org/10.3109/10253890.2015.1053454>

485 Chong, L.S., Thai, M., Cullen, K.R., Lim, K.O., Klimes-Dougan, B., 2017. Cortisol  
486 awakening response, internalizing symptoms, and life satisfaction in emerging

487 adults. *Int. J. Mol. Sci.* 18. <https://doi.org/10.3390/ijms18122501>

488 Clemens, D.H.K., Brigitte M., K., Jens, G., Nicole C., S., Hellhammer., 1999. Impact  
489 of Gender, Menstrual Cycle Phase, and Oral Contraceptives on the Activity of

490 the Hypothalamus-Pituitary-Adrenal Axis. *Psychosom. Med.* 61, 154–162.

491 Cohen S, Kamarck T, Mermelstein R.,1983. A global measure of perceived stress. *J.*  
492 *Heal. Soc. Behav.* 1,385-396.

493 Dawson, M.A., Hamson-Utley, J.J., Hansen, R., Olpin, M., 2014. Examining the  
494 effectiveness of psychological strategies on physiologic markers: Evidence-

495 based suggestions for holistic care of the athlete. *J. Athl. Train.* 49, 331–337.

496 <https://doi.org/10.4085/1062-6050-49.1.09>

497 Ellenbogen, M.A., Carson, R.J., Pishva, R., 2010. Automatic emotional information  
498 processing and the cortisol response to acute psychosocial stress. *Cogn. Affect.*

499 *Behav. Neurosci.* 10, 71–82. <https://doi.org/10.3758/CABN.10.1.71>

500 Entringer, S., Buss, C., Shirtcliff, E.A., Cammack, A.L., Yim, I.S., Chiczy-Demet, A.,  
501 Sandman, C.A., Wadhwa, P.D., 2010. Attenuation of maternal

502 psychophysiological stress responses and the maternal cortisol awakening

503 response over the course of human pregnancy. *Stress* 13, 258–268.

504 <https://doi.org/10.3109/10253890903349501>

- 505 Esch, T; Duckstein, J; Welke, J; Stefano, GB; Braun, V., 2007. Mind/body technique  
506 for physiological and psychological stress reduction: stress management via Tai  
507 Chi training-a pilot study. *Med Sci Monit.* 17, 233–245.
- 508 Espín, L., Marquina, M., Hidalgo, V., Salvador, A., Gómez-Amor, J., 2016. No effects  
509 of psychosocial stress on memory retrieval in non-treated young students with  
510 Generalized Social Phobia. *Psychoneuroendocrinology* 73, 51–62.  
511 <https://doi.org/10.1016/j.psyneuen.2016.07.211>
- 512 Fink, G., 2000. *Encyclopedia of stress.* Academic Press.
- 513 González-Cabrera, J., Fernández-Prada, M., Iribar-Ibabe, C., Peinado, J.M., 2014.  
514 Acute and chronic stress increase salivary cortisol: A study in the real-life setting  
515 of a national examination undertaken by medical graduates. *Stress* 17, 149–  
516 156. <https://doi.org/10.3109/10253890.2013.876405>
- 517 Hakamata, Y., Izawa, S., Sato, E., Komi, S., Murayama, N., Moriguchi, Y.,  
518 Hanakawa, T., Inoue, Y., Tagaya, H., 2013. Higher cortisol levels at diurnal  
519 trough predict greater attentional bias towards threat in healthy young adults. *J.*  
520 *Affect. Disord.* 151, 775–779. <https://doi.org/10.1016/j.jad.2013.06.031>
- 521 Halford, C; Jonsdottir, IH; Eek, F., 2012. Perceived Stress, Psychological Resources  
522 and Salivary Cortisol. *Role Saliva Cortisol Meas. Heal. Dis.* 67–86.  
523 <https://doi.org/10.2174/978160805342111201010067>
- 524 Hsiao, C.P., Moore, I.M., Insel, K.C., Merkle, C.J., 2011. High perceived stress is  
525 linked to afternoon cortisol levels and greater symptom distress in patients with  
526 localized prostate cancer. *Cancer Nurs.* 34, 470–478.  
527 <https://doi.org/10.1097/NCC.0b013e31820a5943>
- 528 Kadison, R., DiGeronimo, T.F., 2004. *College of the overwhelmed: The campus*  
529 *mental health crisis and what to do about it.* San Francisco.
- 530 Kessler, R.C., Andrews, G., Colpe, L.J., Hiripi, E., Mroczek, D.K., Normand, S.-L.T.,  
531 Walters, E.E., Zaslavsky, A.M., 2002. Short screening scales to monitor  
532 population prevalences and trends in non-specific psychological distress.  
533 *Psychol. Med.* 32, 959–976. <https://doi.org/10.1017/S0033291702006074>
- 534 Kudielka, B.M., Kirschbaum, C., 2005. Sex differences in HPA axis responses to  
535 stress: a review. *Biol. Psychol.* 69, 113–132.  
536 <https://doi.org/10.1016/j.biopsycho.2004.11.009>
- 537 Kudielka, B.M., Kirschbaum, C., 2003. Awakening cortisol responses are influenced  
538 by health status and awakening time but not by menstrual cycle phase.  
539 *Psychoneuroendocrinology* 28, 35–47. [https://doi.org/10.1016/S0306-4530\(02\)00008-2](https://doi.org/10.1016/S0306-4530(02)00008-2)
- 540
- 541 Kumar, S., Dagli, R.J., Mathur, A., Jain, M., Prabu, D., Kulkarni, S., 2009. Perceived  
542 sources of stress amongst Indian dental students. *Eur. J. Dent. Educ.* 13, 39–  
543 45. <https://doi.org/10.1111/j.1600-0579.2008.00535.x>
- 544 Kuznetsova, A., Brockhoff, P.B. and Christensen, R.H.B., 2017. lmerTest package:  
545 tests in linear mixed effects models. *J. Stat. Soft.* 82(13).
- 546 Lazarus, R.S. and Folkman, S., 1984. *Stress, appraisal, and coping.* Springer  
547 publishing company.
- 548 Lenth, R. and Lenth, M.R., 2018. Package ‘lsmeans’. *Am. Stat.* 34(4), 216-221.
- 549 Linnemann, A., Ditzen, B., Strahler, J., Doerr, J.M., Nater, U.M., 2015. Music  
550 listening as a means of stress reduction in daily life. *Psychoneuroendocrinology*  
551 60, 82–90. <https://doi.org/10.1016/j.psyneuen.2015.06.008>
- 552 López, J.F., Akil, H., Watson, S.J., 1999. Neural circuits mediating stress. *Biol.*  
553 *Psychiatry* 46, 1461–1471. [https://doi.org/10.1016/S0006-3223\(99\)00266-8](https://doi.org/10.1016/S0006-3223(99)00266-8)

- 554 Manigault, A.W., Woody, A., Zoccola, P.M., Dickerson, S.S., 2018. Education Is  
555 Associated with the Magnitude of Cortisol Responses to Psychosocial Stress in  
556 College Students. *Int. J. Behav. Med.* 25, 532–539.  
557 <https://doi.org/10.1007/s12529-018-9727-y>
- 558 McEwen, B.S., 1998. Protective and Damaging Effects of Stress Mediators. *N. Engl.*  
559 *J. Med.* 338, 171–179. <https://doi.org/10.1056/NEJM199801153380307>
- 560 McEwen, B.S., Wingfield, J.C., 2010. What is in a name? Integrating homeostasis,  
561 allostasis and stress. *Horm. Behav.* 57, 105–111.  
562 <https://doi.org/10.1016/j.yhbeh.2009.09.011>
- 563 Mommersteeg, P.M.C., Heijnen, C.J., Kavelaars, A., van Doornen, L.J.P., 2007. The  
564 HPA-axis and immune function in burnout. *Prog. Brain Res.* 167, 281–285.  
565 [https://doi.org/10.1016/S0079-6123\(07\)67024-1](https://doi.org/10.1016/S0079-6123(07)67024-1)
- 566 Morra, D.J., Regehr, G., Ginsburg, S., 2008. Anticipated debt and financial stress in  
567 medical students. *Med. Teach.* 30, 313–315.  
568 <https://doi.org/10.1080/01421590801953000>
- 569 Myint, K., Choy, K.L., Su, T.T., Lam, S.K., 2011. The effect of short-term practice of  
570 mindfulness meditation in alleviating stress in university students. *Biomed. Res.*  
571 22, 165–171.
- 572 Nader, N., Chrousos, G.P., Kino, T., 2010. Interactions of the circadian CLOCK  
573 system and the HPA axis. *Trends Endocrinol. Metab.* 21, 277–286.  
574 <https://doi.org/10.1016/J.TEM.2009.12.011>
- 575 Patel, V., Flisher, A.J., Hetrick, S., McGorry, P., 2007. Mental health of young  
576 people: a global public-health challenge. *Lancet* 369, 1302–1313.  
577 [https://doi.org/10.1016/S0140-6736\(07\)60368-7](https://doi.org/10.1016/S0140-6736(07)60368-7)
- 578 Putterman, E., Linden, W., 2006. Cognitive dietary restraint and cortisol: Importance  
579 of pervasive concerns with appearance. *Appetite* 47, 64–76.  
580 <https://doi.org/10.1016/j.appet.2006.02.003>
- 581 Sapolsky, R.M., 1996. Stress, the aging brain, and the mechanisms of neuron death.  
582 *Stress.* 1 (1), 1–19. <https://psycnet.apa.org/record/1992-98654-000> (accessed  
583 5.4.19).
- 584 Sapolsky, R.M., Romero, L.M., Munck, A.U., 2000. How Do Glucocorticoids  
585 Influence Stress Responses? Integrating Permissive, Suppressive, Stimulatory,  
586 and Preparative Actions <sup>1</sup>. *Endocr. Rev.* 21, 55–89.  
587 <https://doi.org/10.1210/edrv.21.1.0389>
- 588 Schlotz, W., Hammerfald, K., Ehlert, U., Gaab, J., 2011. Individual differences in the  
589 cortisol response to stress in young healthy men: Testing the roles of perceived  
590 stress reactivity and threat appraisal using multiphase latent growth curve  
591 modeling. *Biol. Psychol.* 87, 257–264.  
592 <https://doi.org/10.1016/j.biopsycho.2011.03.005>
- 593 Schlotz, W., Kumsta, R., Layes, I., Entringer, S., Jones, A., Wüst, S., 2008.  
594 Covariance Between Psychological and Endocrine Responses to  
595 Pharmacological Challenge and Psychosocial Stress: A Question of Timing.  
596 *Psychosom. Med.* 70, 787–796.  
597 <https://doi.org/10.1097/PSY.0b013e3181810658>
- 598 Schulz, P., Schlotz, W., 1999. The Trier Inventory for the Assessment of Chronic  
599 Stress (TICS): Scale construction, statistical testing, and validation of the scale  
600 work overload. *Diagnostica* 45, 8–19. <https://doi.org/10.1026/0012-1924.45.1.8>
- 601 Singh, R., Goyal, M., Tiwari, S., Ghildiyal, A., Nattu, S.M., Das, S., 2012. Effect of  
602 examination stress on mood, performance and cortisol levels in medical  
603 students. *Indian J. Physiol. Pharmacol.* 56, 48–55.

- 604 Stetler, C., Miller, G.E., 2005. Blunted Cortisol Response to Awakening in Mild to  
605 Moderate Depression: Regulatory Influences of Sleep Patterns and Social  
606 Contacts. *J. Abnorm. Psychol.* 114, 697–705. [https://doi.org/10.1037/0021-](https://doi.org/10.1037/0021-843X.114.4.697)  
607 [843X.114.4.697](https://doi.org/10.1037/0021-843X.114.4.697)
- 608 Tennant, C., 2002. Life events, stress and depression: a review of recent findings.  
609 *Aust. New Zealand J. Psych.* 36 (2), 173–182.  
610 <https://doi.org/10.1046/j.1440-1614.2002.01007.x>
- 611 Thoma, M. V., Gianferante, D., Hanlin, L., Fiksdal, A., Chen, X., Rohleder, N., 2017.  
612 Stronger hypothalamus-pituitary-adrenal axis habituation predicts lesser  
613 sensitization of inflammatory response to repeated acute stress exposures in  
614 healthy young adults. *Brain. Behav. Immun.* 61, 228–235.  
615 <https://doi.org/10.1016/j.bbi.2016.11.030>
- 616 Tsigos, C., Chrousos, G.P., 2002. Hypothalamic–pituitary–adrenal axis,  
617 neuroendocrine factors and stress. *J. Psychosom. Res.* 53, 865–871.  
618 [https://doi.org/10.1016/S0022-3999\(02\)00429-4](https://doi.org/10.1016/S0022-3999(02)00429-4)
- 619 Wada, H., Hahn, T.P., Breuner, C.W., 2007. Development of stress reactivity in  
620 white-crowned sparrow nestlings: Total corticosterone response increases with  
621 age, while free corticosterone response remains low. *Gen. Comp. Endocrinol.*  
622 150, 405–413. <https://doi.org/10.1016/J.YGCEN.2006.10.002>
- 623 Watson, D., Clark, L. A., & Tellegen, A. (1988). Development and validation of brief  
624 measures of positive and negative affect: The PANAS scales. *J. Person. Soc.*  
625 *Psychol.* 54(6), 1063-1070.  
626 <http://dx.doi.org/10.1037/0022-3514.54.6.1063>
- 627 Wessa, M., Rohleder, N., Kirschbaum, C., Flor, H., 2006. Altered cortisol awakening  
628 response in posttraumatic stress disorder. *Psychoneuroendocrinology* 31, 209–  
629 215. <https://doi.org/10.1016/J.PSYNEUEN.2005.06.010>
- 630 Wetherell, M., Montgomery, C., Smith, M., 2015. The effects of anticipated challenge  
631 on indices of diurnal cortisol secretion in recreational users of ecstasy.  
632 *Psychoneuroendocrinology* 61, 58.  
633 <https://doi.org/10.1016/j.psyneuen.2015.07.549>
- 634 Whitworth, J.A., Williamson, P.M., Mangos, G., Kelly, J.J., 2005. Cardiovascular  
635 consequences of cortisol excess. *Vasc. Health Risk Manag.* 1, 291–9.  
636 <https://doi.org/10.2147/vhrm.2005.1.4.291>
- 637 Wilcox, H.C., Arria, A.M., Caldeira, K.M., Vincent, K.B., Pinchevsky, G.M., O’Grady,  
638 K.E., 2010. Prevalence and predictors of persistent suicide ideation, plans, and  
639 attempts during college. *J. Affect. Disord.* 127, 287–294.  
640 <https://doi.org/10.1016/J.JAD.2010.04.017>
